# Supplementary material
Source: Springer Nature journal article supplement (https://www.springermedizin.de/resource/supplementary/12968_2011_2606_MOESM1_ESM.pdf/9582308)

**A**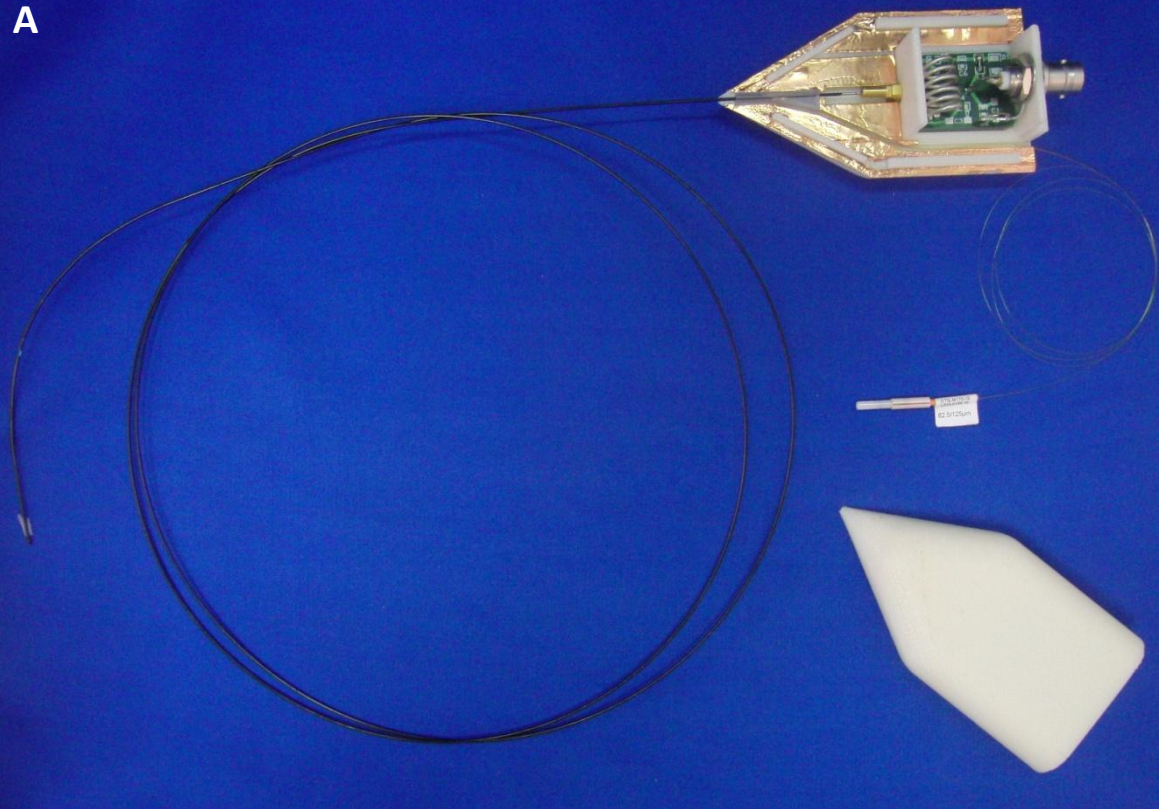**B**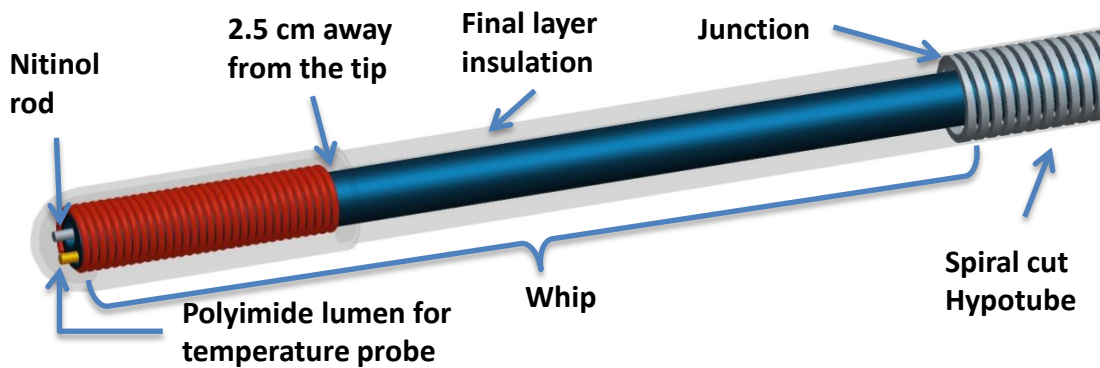

Supplement: MOESM1 [file 9582308]
